# Supplementary material for: Odontogenic Sinusitis: Clinical, Radiologic, and Quality-of-Life Characterization in a Prospective Study
Source: Research Square preprint supplement (doi:10.21203/rs.3.rs-7077259/v1), 2025-08-11

**APPENDIX**

**SINO-NASAL OUTCOME TEST (SNOT-22)**

**Date: ________________**

**Patient Code: _________________**

**Practitioner: _________________**

| **SYMPTOMS&SOCIAL/EMOTIONAL PERCEPTIONS** | No Problem | Very Mild | Mild or Slight | Moderate | Severe | As bad as it can be | Domain | Total by domain |
| --- | --- | --- | --- | --- | --- | --- | --- | --- |
| 0 | 1 | 2 | 3 | 4 | 5 |
| 1. **Need to blow nose** |  |  |  |  |  |  | NASAL |  |
| 1. **Nasal blockage** |  |  |  |  |  |  |
| 1. **Sneezing** |  |  |  |  |  |  |
| 1. **Runny nose** |  |  |  |  |  |  |
| 1. **Cough** |  |  |  |  |  |  |
| 1. **Post-nasal discharge** |  |  |  |  |  |  |
| 1. **Thick nasal discharge** |  |  |  |  |  |  |
| 1. **Decreased sense of smell/taste** |  |  |  |  |  |  | EAR/  FACIAL |  |
| 1. **Ear fullness** |  |  |  |  |  |  |
| 1. **Dizziness** |  |  |  |  |  |  |
| 1. **Ear pain** |  |  |  |  |  |  |
| 1. **Facial pain/pressure** |  |  |  |  |  |  |
| 1. **Difficulty falling asleep** |  |  |  |  |  |  | SLEEP |  |
| 1. **Wake up at night** |  |  |  |  |  |  |
| 1. **Lack of a good night’s sleep** |  |  |  |  |  |  |
| 1. **Wake up tired** |  |  |  |  |  |  |
| 1. **Fatigue** |  |  |  |  |  |  | FCT |  |
| 1. **Reduced productivity** |  |  |  |  |  |  |
| 1. **Reduced concentration** |  |  |  |  |  |  |
| 1. **Frustrated/restless/irritable** |  |  |  |  |  |  | PSYCHO |  |
| 1. **Sad** |  |  |  |  |  |  |
| 1. **Embarrassed** |  |  |  |  |  |  |
| **TOTAL SNOT-22** |  | | | | | | | |

**Lund-Mackay Staging System**

| **SINUS: L/R** | No  Opacification | Partial  Opacification | | Total  Opacification |
| --- | --- | --- | --- | --- |
| *Maxillary* | 0 | 1 | | 2 |
| *Anterior Ethmoid* | 0 | 1 | | 2 |
| *Posterior Ethmoid* | 0 | 1 | | 2 |
| *Frontal* | 0 | 1 | | 2 |
| *Sphenoid* | 0 | 1 | | 2 |
| *Ostiomeatal*  *Complex* | Patent | | Obstructed | |
| 0 | | 2 | |
| **TOTAL**  **LM Score** |  | | | |

**Table-1: The different SNOT-22 domains and their respective mean scores and standard deviations (SD) in the study sample.**

| **SNOT-22 Domains** | **Mean** | **SD** |
| --- | --- | --- |
| *NASAL* | 22.26 | 8.92 |
| *FACIAL-EAR* | 8.45 | 4.73 |
| *SLEEP* | 7.74 | 6.61 |
| *FUNCTION* | 6.24 | 5.13 |
| *PSYCHOLOGIC* | 5.79 | 4.93 |
| *FUNCTION****+***  *PSYCHOLOGIC* | 12.03 | 9.57 |
| *TOTAL SNOT-22* | 48.71 | 22.84 |
|  |  |  |

**Figure-1: Radar Plot comparing SNOT-22 domains’ scores between patients presenting purulence and patients without purulence.**


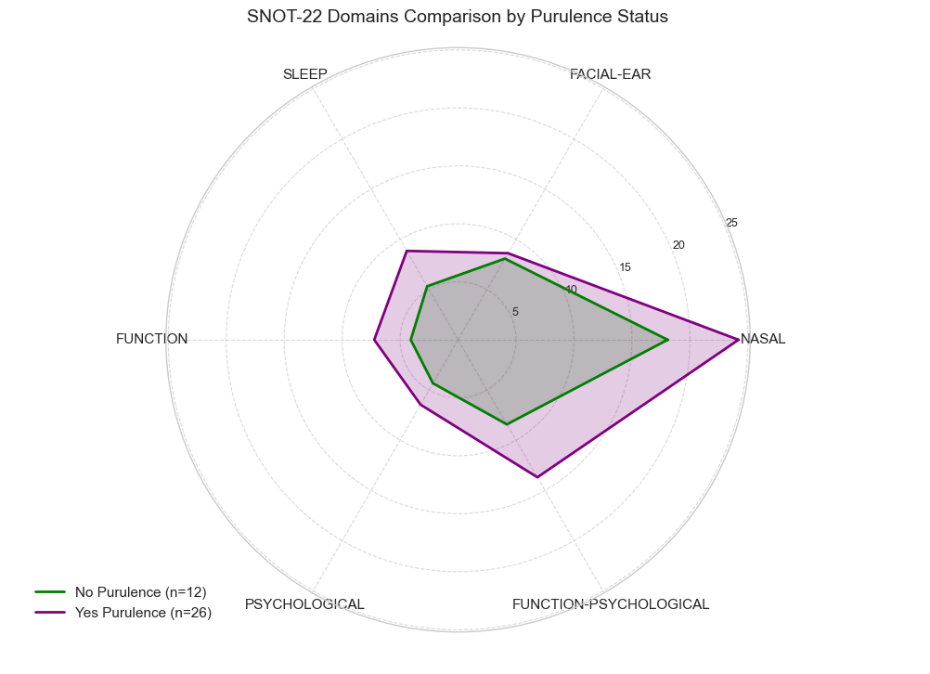

Supplement: Supplementary file 1 [file 6711700a9cff90edc6fc9e5e.docx]
